# Supplementary material
Source: PubMed Central journal article supplement (PMC1622870)

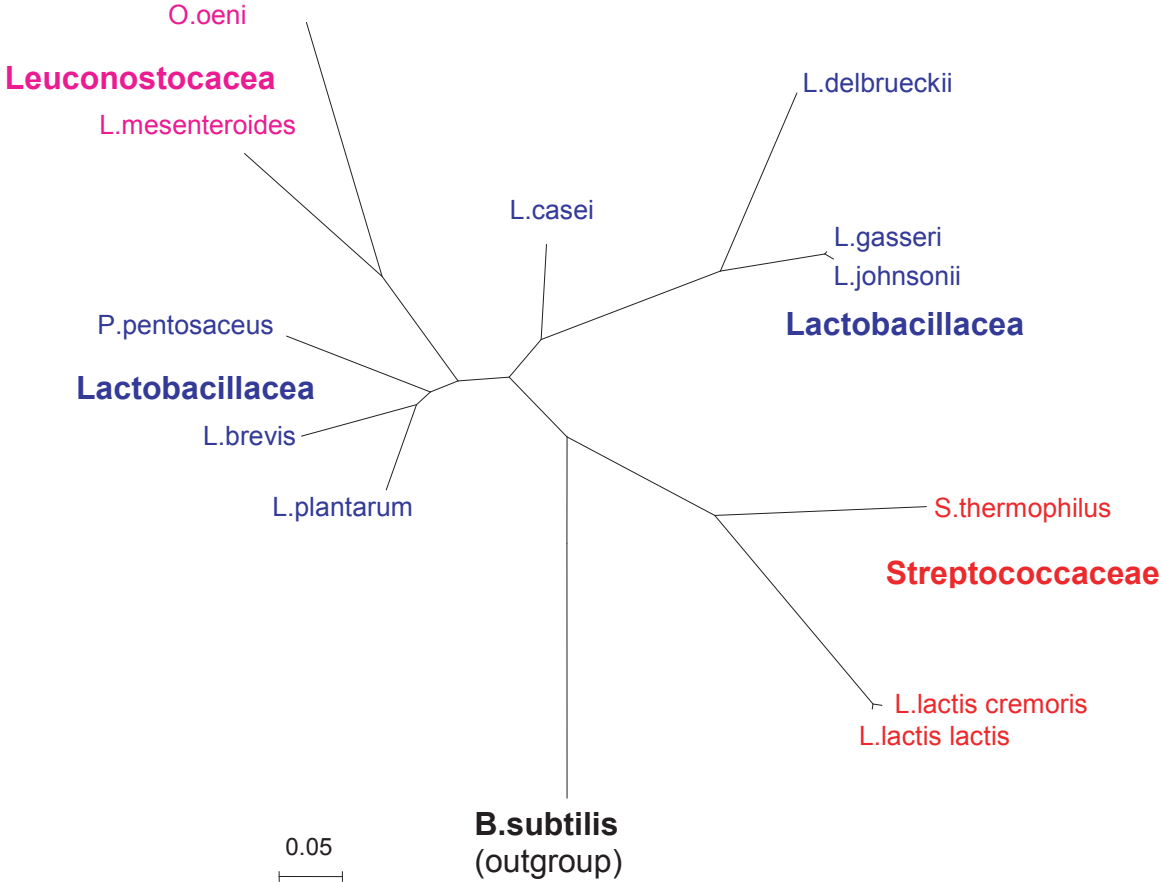

Supplement: pnas_0607117103_1.pdf [file pnas_0607117103_1.pdf]

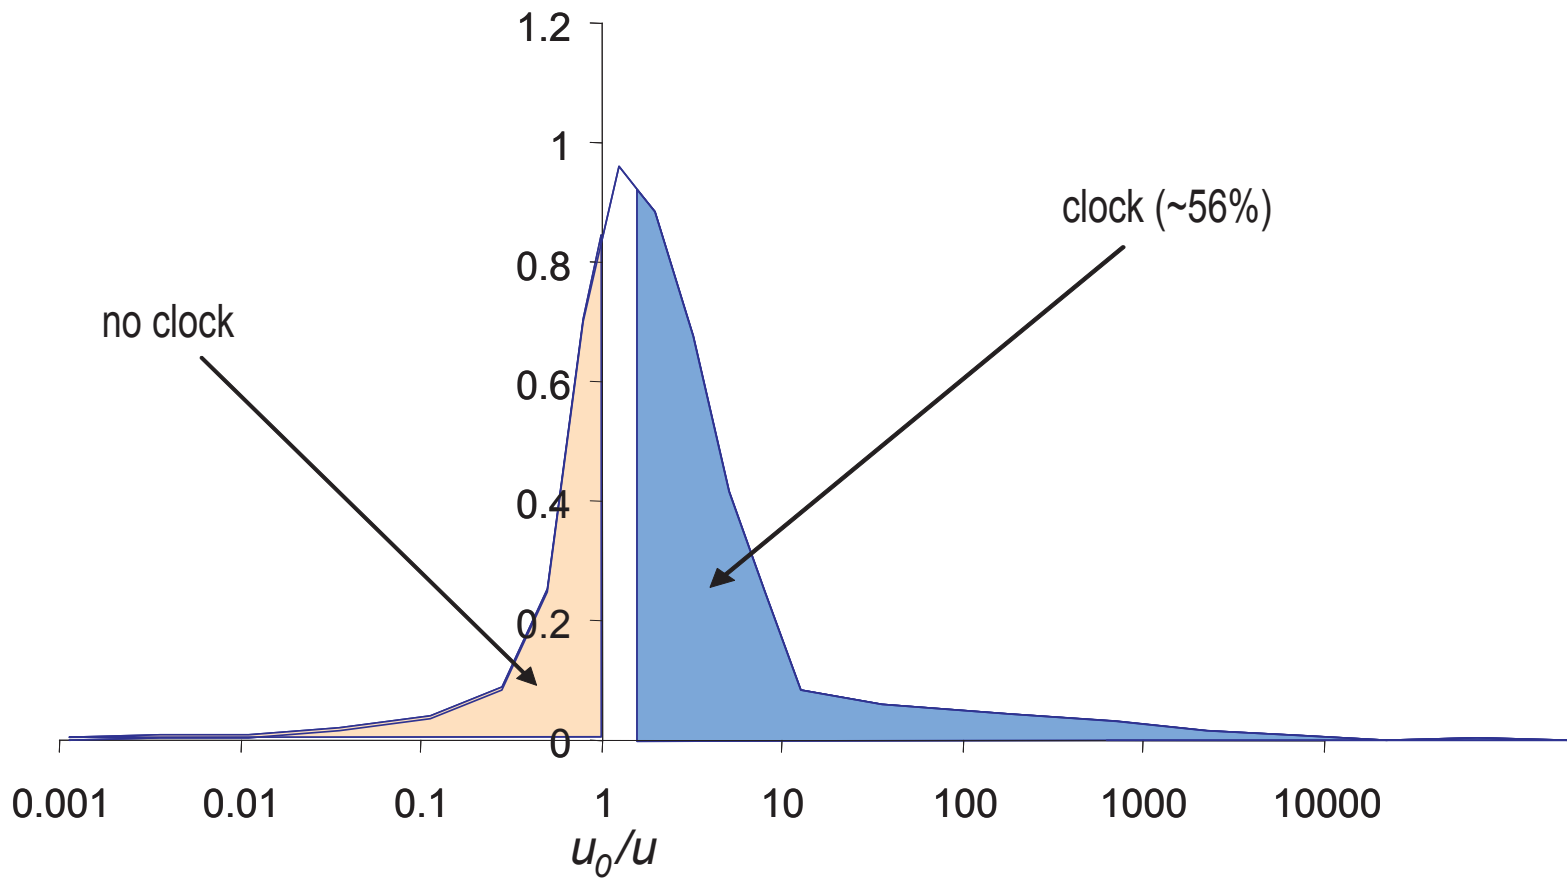

Supplement: pnas_0607117103_2.pdf [file pnas_0607117103_2.pdf]

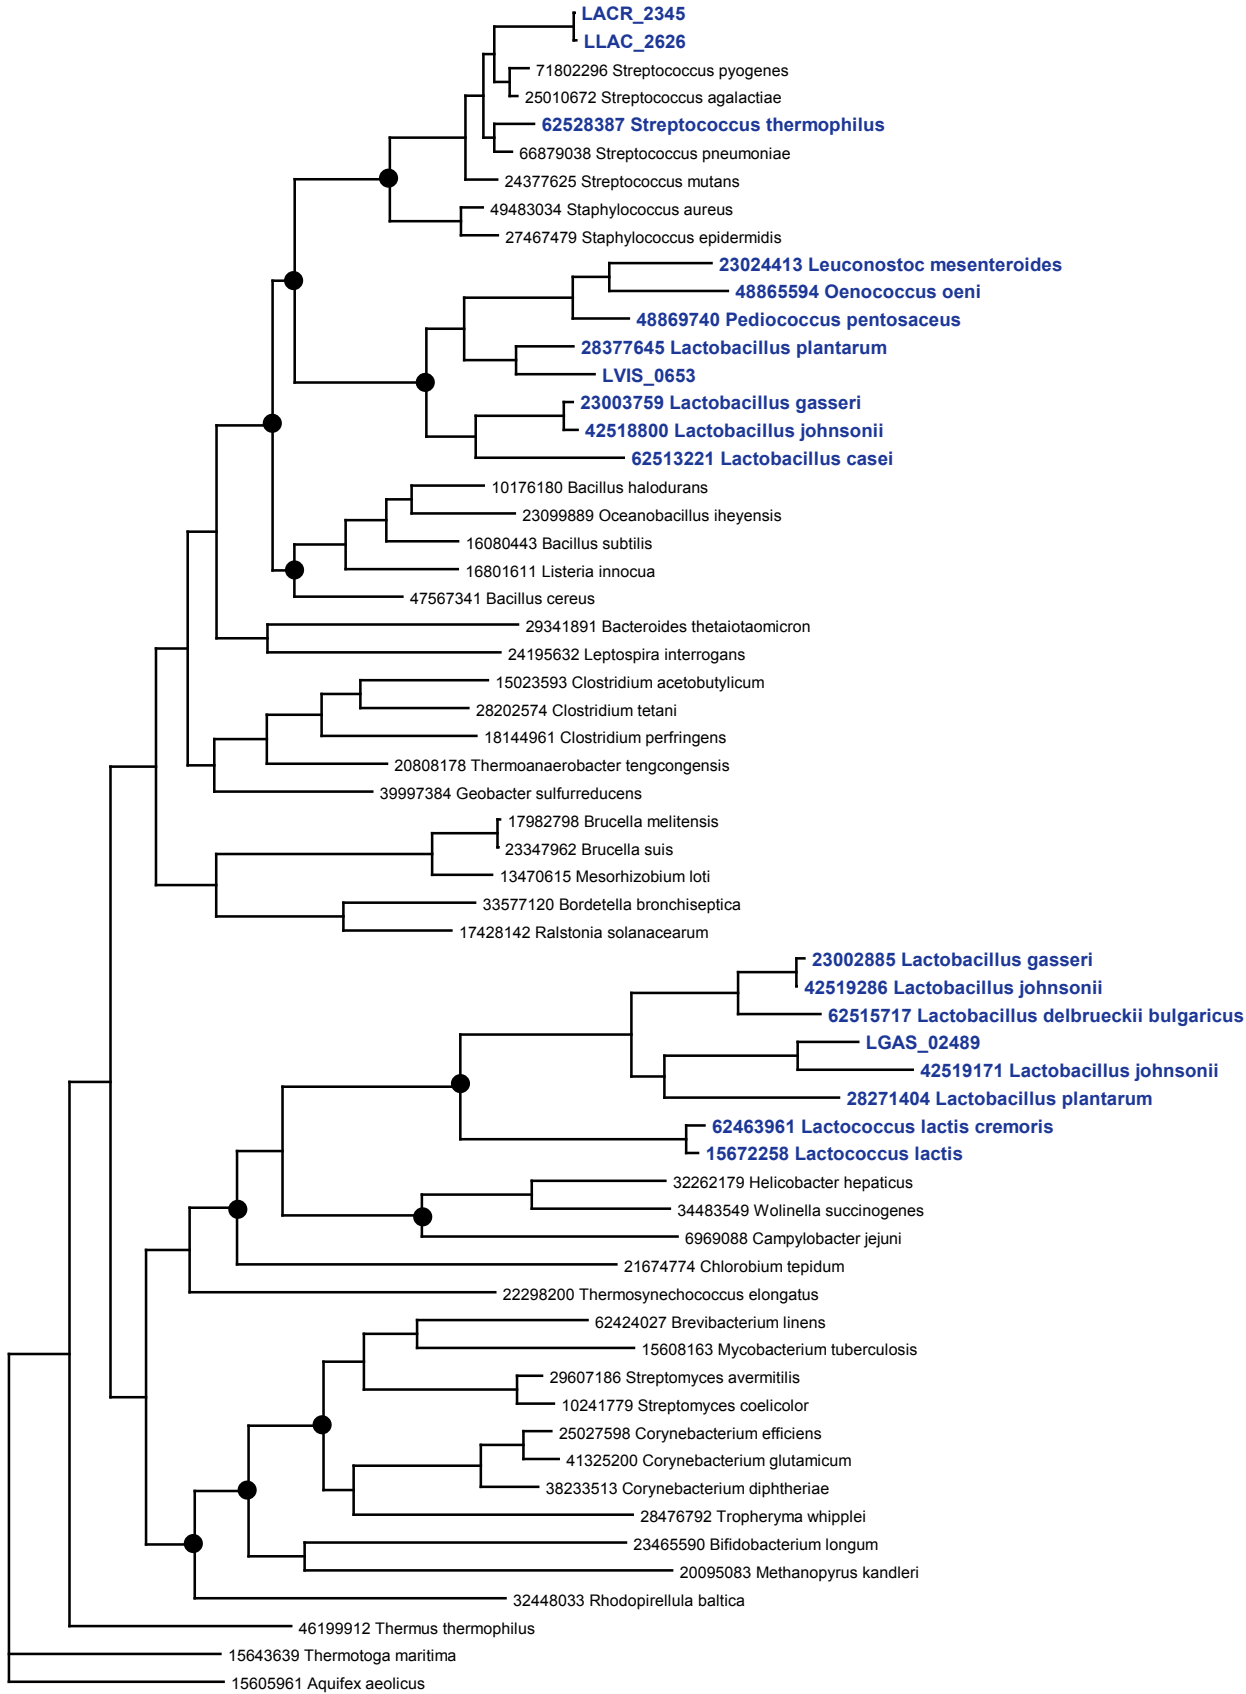

Supplement: pnas_0607117103_3.pdf [file pnas_0607117103_3.pdf]

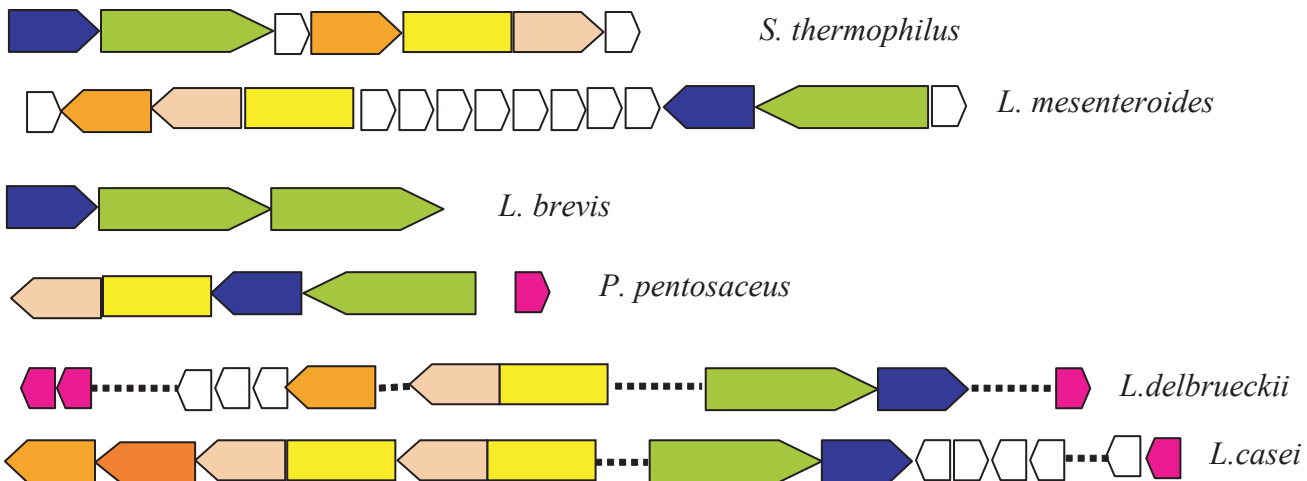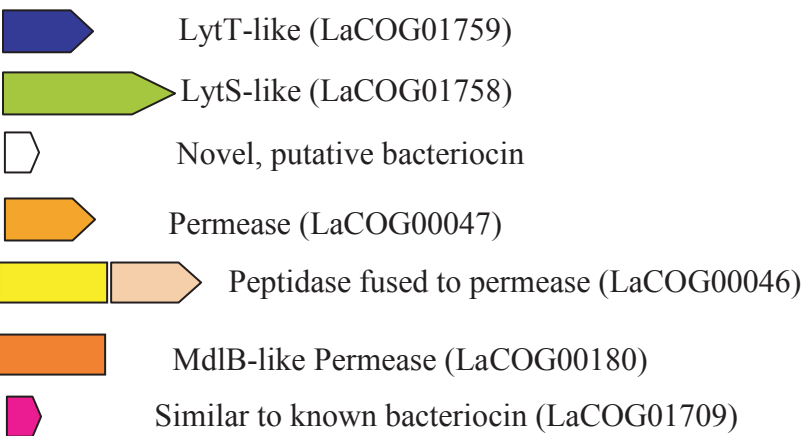

Supplement: pnas_0607117103_5.pdf [file pnas_0607117103_5.pdf]
